# Supplementary material for: Risk of sudden unexplained death after use of dihydroartemisinin–piperaquine for malaria: a systematic review and Bayesian meta-analysis
Source: PubMed Central journal article supplement — Lancet Infect Dis. 2018 Aug;18(8):913–23. doi: 10.1016/S1473-3099(18)30297-4 (PMC6060085; doi:10.1016/s1473-3099(18)30297-4), 2018-08
Supplement: mmc1.pdf [file mmc1.pdf]

# THE LANCET Infectious Diseases

## Supplementary webappendix

This webappendix formed part of the original submission and has been peer reviewed. We post it as supplied by the authors.

Supplement to: Chan XHS, Win YN, Mawer LJ, et al. Risk of sudden unexplained death after use of dihydroartemisinin–piperaquine for malaria: a systematic review and Bayesian meta-analysis. *Lancet Infect Dis* 2018; published online June 7. [http://dx.doi.org/10.1016/S1473-3099\(18\)30297-4](http://dx.doi.org/10.1016/S1473-3099(18)30297-4).

## SUPPLEMENTARY APPENDIX

### Risk of Sudden Unexplained Death after Use of Dihydroartemisinin-Piperaquine for Malaria: A Systematic Review and Bayesian Meta-analysis

Xin Hui S Chan, Yan Naung Win, Laura J Mawer, Jireh Y Tan, Josep Brugada & Nicholas J White

#### Search Strategy

An electronic literature search was conducted of the following clinical bibliographic databases for journal articles and conference abstracts: MEDLINE, EMBASE, Web of Science, CINAHL, the Cochrane Database of Systematic Reviews, the Cochrane Central Register of Controlled Trials, the Database of Abstract of Reviews of Effects, Global Health, the WHO Global Health Library, and the WWARN Clinical Trials of Uncomplicated Malaria Publication Library. We searched for “dihydroartemisinin-piperaquine” as title, abstract, and subject heading keywords, using synonyms and variant spellings as additional search terms. We excluded animal studies, but did not apply language or publication date limits. All references were imported into EndNote, de-duplicated, and screened against eligibility criteria.

E.g. Medline search on 24 May 2017

# Searches

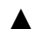

- 1 ((dihydroartemisinin adj2 piperaquine) or dihydroartemisinin?piperaquine or dhappq or dha-ppq).mp.
- 2 ((Artekin or Eurartesim or Diphos or Timequin or Duocotecxin or Malacur) and (malaria\* or antimalaria\* or anti-malaria\* or plasmodium\*)).mp.
- 3 1 or 2
- 4 exp animals/ not humans.sh.
- 5 3 not 4

#### Data Extraction

##### *Additional Methods*

The following information was extracted from study reports and trial database records, and where necessary, requested from study investigators:

- 1) Study and participant characteristics: study year of publication, study location, study design, treatment indication, inclusion and exclusion criteria, participant mean or median age with standard deviation or interquartile range
- 2) Drug dosing: regimen including dosing tables and DHA-PPQ brand name, frequency of courses if repeated, directly observed therapy/adherence checks
- 3) Pharmacovigilance: adverse event monitoring system, any other follow-up, number lost to follow-up after DHA-PPQ and comparators (if any) with reasons
- 4) Exposures: number of individuals treated with DHA-PPQ and comparators (if any), number of courses of DHA-PPQ administered with adherence figures if available
- 5) Adverse events: deaths after DHA-PPQ and comparators (if any), any other cardiac

If a death was identified, the following information about the deceased subject was sought from investigators:

- 1) Demographics: age and gender
- 2) Medical history: syncope or non-fatal cardiac arrest, other comorbidities, comedications
- 3) Family history: syncope, sudden cardiac death
- 4) Drug dosing: dose round, dose number, dose date, dose time
- 5) Death: death date, death time, autopsy report
- 6) Further investigator input: assessment of relatedness to drug, serious adverse event report

#### *Additional Results*

Further information about deaths from publications, trial documentation, and investigator contact is summarised in Table S1.

**Table S1: Additional Characteristics of Deaths Identified after Dihydroartemisinin-Piperaquine**

| <b>Characteristics of All Deaths</b>                                 | <b>Deaths at any Timepoint<br/>(out of 61)</b> | <b>Deaths within 30 Days<br/>(out of 31)</b> |
|----------------------------------------------------------------------|------------------------------------------------|----------------------------------------------|
| Age                                                                  | 60                                             | 30                                           |
| Gender                                                               | 59                                             | 30                                           |
| Time of death relative to dosing                                     | 56                                             | 31                                           |
| Assessment of relationship to DHA-PPQ                                | 50                                             | 23                                           |
| Data Safety Monitoring Board oversight (+ Safety Monitor only)       | 50 (+ 4)                                       | 25 (+ 3)                                     |
| <b>Characteristics of Specific Deaths only</b>                       | <b>Deaths at any Timepoint<br/>(out of 61)</b> | <b>Deaths within 30 Days<br/>(out of 31)</b> |
| Comorbidities                                                        | 9                                              | 6                                            |
| Comedications (including alcohol)                                    | 2                                              | 2                                            |
| History of fits, syncope, or cardiac arrest (personal and/or family) | 1                                              | 1                                            |
| <b>Source of Additional Information</b>                              | <b>Deaths at any Timepoint<br/>(out of 61)</b> | <b>Deaths within 30 Days<br/>(out of 31)</b> |
| Investigator contact                                                 | 60                                             | 30                                           |
| Serious adverse event report                                         | 16                                             | 8                                            |
| Autopsy report                                                       | 1                                              | 1                                            |

DHA-PPQ = dihydroartemisinin-piperaquine

Characteristics expected to be present for all deaths were well-reported in general. Data Safety Monitoring Board oversight was confirmed in all except six studies of which three had a Safety Monitor. In keeping with the populations of malaria-endemic regions being young with often limited access to healthcare for prior diagnoses, information about comorbidities and comedications preceding study entry was limited.

## Data Analysis

### Standardisation of Rates of Sudden Cardiac Death and Drug-induced Torsade de Pointes from the Literature

**Table S2: Standardisation of Population Rates from the Literature to 30-Day Risks for Analysis**

| Reference                  | Type of Estimate                                                                                      | Reported Risk/Rate             | Scaled 30-day Risk*     |
|----------------------------|-------------------------------------------------------------------------------------------------------|--------------------------------|-------------------------|
| Sarganas 2014 <sup>1</sup> | Drug-induced TdP in the general population                                                            | 3.2 in 1,000,000 person-years  | 1 in 3,750,000 subjects |
| Molokhia 2008 <sup>2</sup> | Drug-induced TdP in the general population                                                            | 10.9 in 1,000,000 person-years | 1 in 1,100,912 subjects |
| Darpo 2001 <sup>3</sup>    | Drug-induced TdP in the general population                                                            | 13.3 in 1,000,000 person-years | 1 in 902,250 subjects   |
| Roden 2016 <sup>4</sup>    | Drug-induced TdP after non-cardiovascular drugs                                                       | 1 in 1,000,000 exposures       | 1 in 1,000,000 subjects |
| Ackerman 2016 <sup>5</sup> | SCD in the young (<35 years)<br>[lower bound of 18 studies from Europe, North America, and East Asia] | 7 in 1,000,000 person-years    | 1 in 1,714,280 subjects |
| Ackerman 2016 <sup>5</sup> | SCD in the young (<35 years)<br>[upper bound of 18 studies from Europe, North America, and East Asia] | 101 in 1,000,000 person-years  | 1 in 118,806 subjects   |
| Bagnall 2016 <sup>6</sup>  | SCD in the young (<35 years)<br>[Australasia – Australia and New Zealand]                             | 13 in 1,000,000 person-years   | 1 in 923,071 subjects   |
| Bonny 2017 <sup>7</sup>    | SCD in the young (<35 years)<br>[Sub-Saharan Africa – Cameroon]                                       | 119 in 1,000,000 person-years  | 1 in 100,835 subjects   |

TdP = torsade de pointes, SCD = sudden cardiac death. \*Incidence rates reported in person-years were scaled to monthly 30-day risks with an actuarial approximation using the following formula:  $P_{\text{month}} = 1 - [(1 - P_{\text{year}})^{(1/12)}]$

### Model Details, Results, and Sensitivity Analyses

#### Modelling the Likelihood

The overall likelihood was modelled as jointly independent binomial processes in view of these characteristics of the data:

- 1) The outcome of interest being binary, with each individual receiving the drug being an independent trial which resulted in one of two outcomes, either sudden unexplained death (SUD) or no SUD within one terminal elimination half-life of DHA-PPQ
- 2) The number of individual subjects receiving DHA-PPQ within each study, i.e. the number of trials within each unit of repeated trials, being fixed
- 3) Each study being conducted independently of all other studies, i.e. independence across units

Of related distributions, such as the Poisson, the binomial distribution was thought to be most appropriate for this dataset in consideration of the above characteristics of the data.

#### Estimating the Parameter of Interest

A complete pooling intercept-only model, i.e. a fixed-effects model assuming the true risk of SUD after DHA-PPQ was the same in all studies, was used to estimate the risk of SUD after DHA-PPQ. As the regression software we used utilises a sampling algorithm for parameter estimation, the extremely low event count in the data precluded the use of a partial pooling hierarchical generalised linear model with covariate levels.

#### Computation of the Posterior Distribution and Posterior Predictive Check

Posterior distributions were estimated using Markov chain Monte Carlo with a Hamiltonian proposal. Convergence of the Hamiltonian algorithm was done by running four independent chains and computing the Gelman-Rubin statistic which was below the threshold of tolerance (1.01). Visual posterior predictive checks were satisfactory.

#### Results of the Meta-analysis

The results of the meta-analysis are summarised graphically in Figure S1.

**Figure S1: Posterior Probability Distribution of Risk of Sudden Unexplained Death after Dihydroartemisinin-Piperaquine with 95% Credible Interval Compared with Baseline 30-Day Risk of Sudden Cardiac Death in the Young**

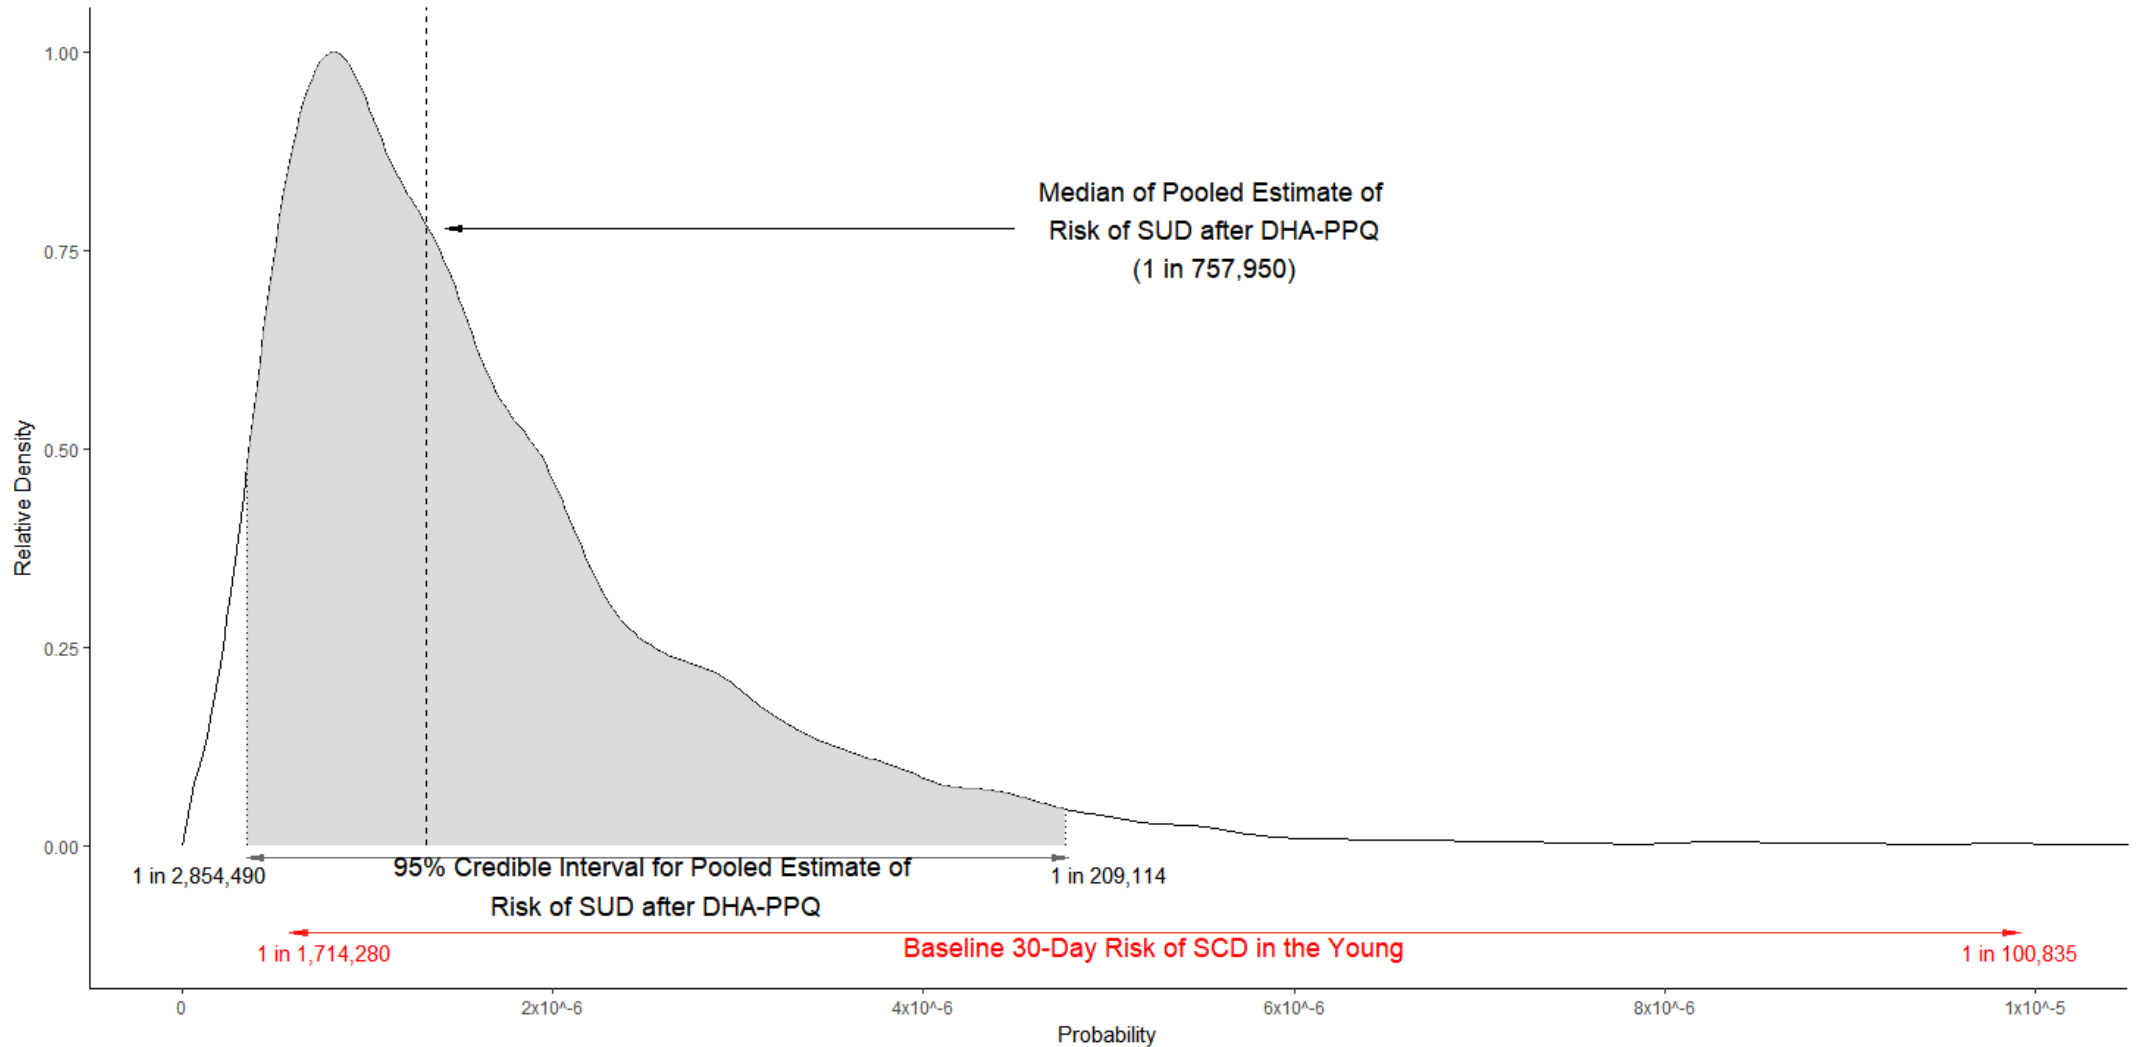

SUD = sudden unexplained death, SCD = sudden cardiac death, DHA-PPQ = dihydroartemisinin-piperaquine. The curve represents the posterior probability distribution function of the true value of the risk of SUD after DHA-PPQ. The probability the true value of the risk of SUD after DHA-PPQ lies between any two values  $a$  and  $b$  on the x-axis is the integral from  $a$  to  $b$ , i.e. the mass of the distribution.

### Sensitivity Analyses – Priors

Sensitivity analyses were conducted using weakly informative alternative priors centred on probabilities about half an order of magnitude higher and lower than the prior used for the main model in keeping with the observed risks of this type of adverse event in the literature<sup>1-4</sup> (also listed in Table S2).

**Figure S2: Prior and Posterior Probability Distributions of the Risk of Sudden Unexplained Death after Dihydroartemisinin-Piperaquine under Different Priors**

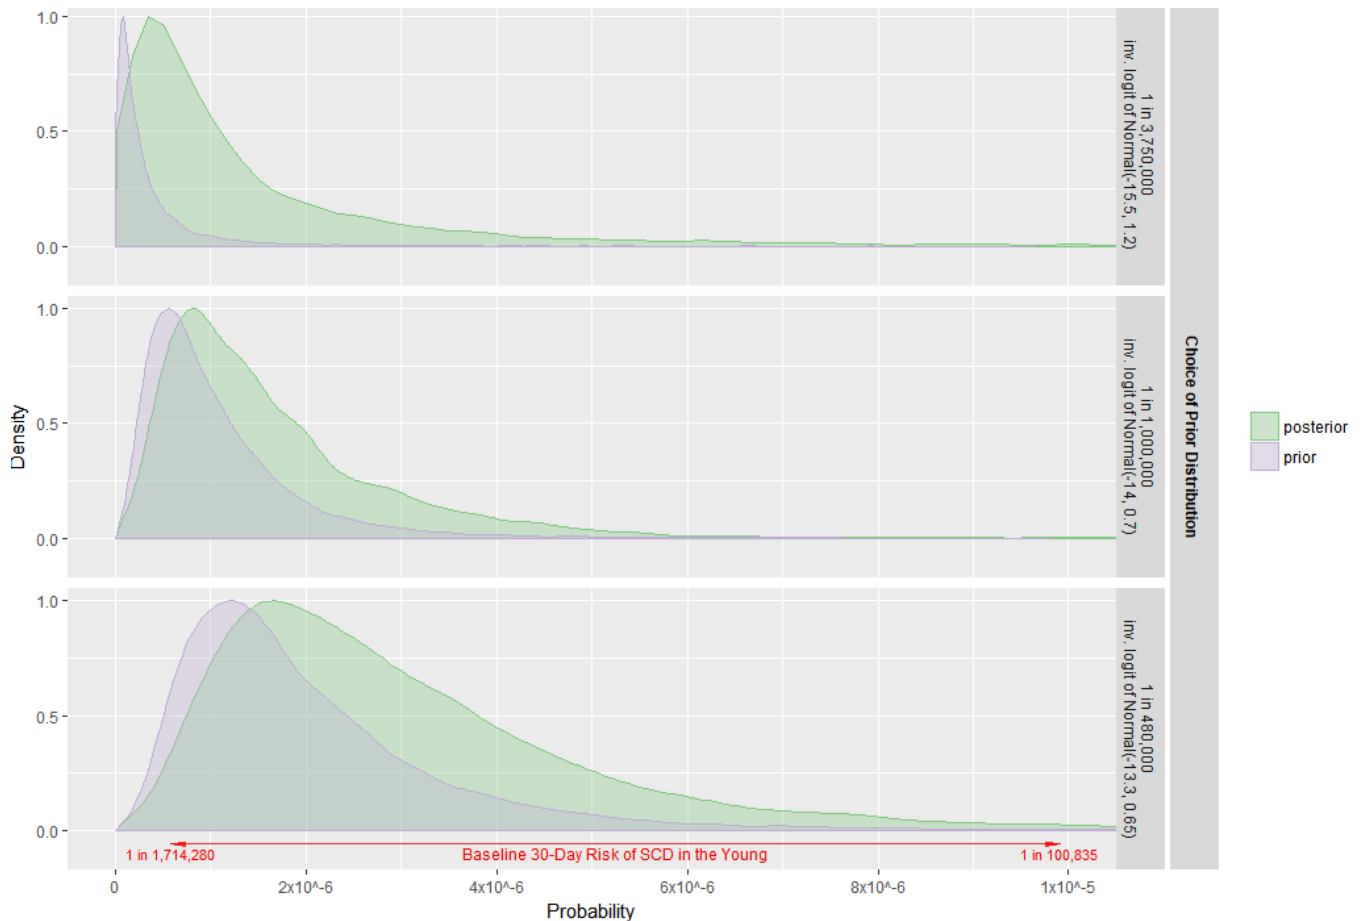

SCD = sudden cardiac death

From Figure S2, we can see that while the posterior probability mass shifted slightly with the use of each different prior, all of the posterior probability masses remained very close to zero and the vast majority of all the posterior probability masses remained within or below the boundaries of the reference range of baseline 30-day risk of SCD in the young. The conclusion that the risk of SUD after DHA-PPQ is extremely low and not higher than the baseline rate of SCD in the young appears to be robust for this range of priors.

### Sensitivity Analyses – Quality of Follow-up

We also performed sensitivity analyses to consider the effects of adding or removing studies with different levels of follow-up (Figure S3). We excluded the studies which had <28 days of follow-up: these were two studies with follow-up time of 3 days (n = 104,371). In a separate sensitivity analysis, we added data from a large intermittent preventive therapy study (n = 40,166) published in 2017 by Coldiron and colleagues.<sup>8</sup> We did not include this study in the main meta-analysis according to our inclusion criteria as it had no active surveillance for adverse events. However, the authors state it is unlikely deaths would have been missed as the study was conducted with reinforced passive surveillance in the contained setting of a refugee camp.

**Figure S3: Posterior Probability Distributions of the Risk of Sudden Unexplained Death after Dihydroartemisinin-Piperaquine with Addition and Removal of Studies with Different Quality of Follow-up**

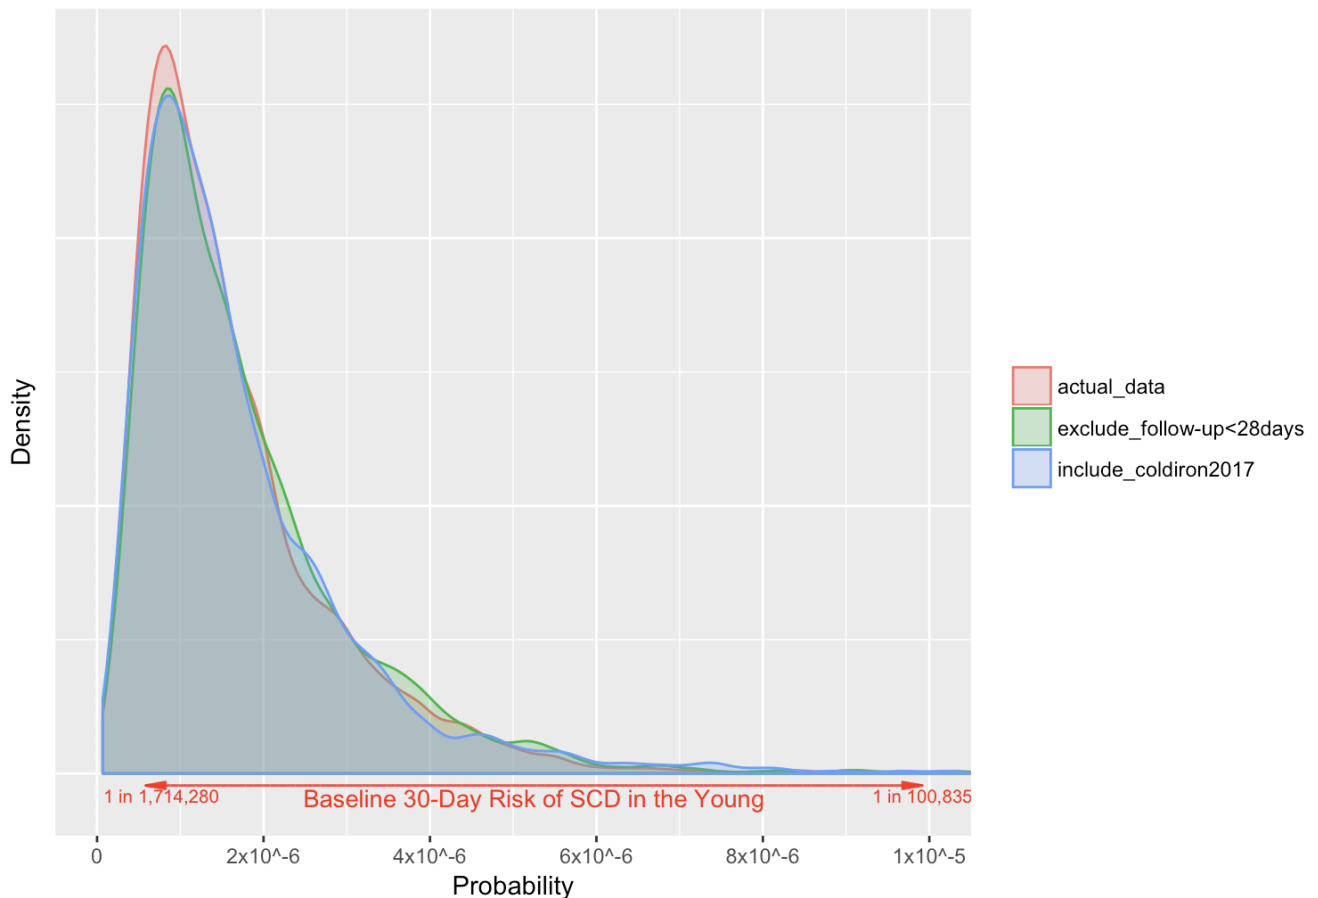

The posterior probability distributions did not change discernibly with the addition of the Coldiron 2017 study or the exclusion of studies with follow-up of <28 days. The conclusion that the risk of SUD after DHA-PPQ is extremely low and not higher than the baseline rate of SCD in the young appears to be robust to these changes to included studies.

*The Frequentist Approach Performs Unsatisfactorily*

From the very low baseline risks obtained from Table S2, we would expect frequentist confidence interval estimation to perform poorly with our data.

We used the recommended asymptotic and Agresti-Coull methods for large sample sizes<sup>9</sup> to estimate a 95% confidence interval for the one SUD we found among 197,867 subjects who received DHA-PPQ. With the very low event rate, frequentist 95% confidence interval estimates for the absolute risk of sudden unexplained death indeed exhibited unsatisfactory properties with negative lower bounds (Table S3).

**Table S3: Frequentist 95% Confidence Intervals for the Risk of Sudden Unexplained Death after DHA-PPQ**

| Method        | x | n       | Mean           | Lower bound of 95% CI | Upper bound of 95% CI |
|---------------|---|---------|----------------|-----------------------|-----------------------|
| Asymptotic    | 1 | 197,867 | 0.000005053900 | -0.00000485153680     | 0.00001495934         |
| Agresti-Coull | 1 | 197,867 | 0.000005053900 | -0.00000216733337     | 0.00003168891         |

Since we are estimating a proportion between zero and one, the 95% confidence intervals in Table S4 allocate belief to impossible values, and the coverage of these intervals may be well below 95%. Although some corrections may enforce strictly non-negative confidence intervals, they may not guarantee the appropriate coverage<sup>9</sup>, so would be deemed unsatisfactory for use in this case.

## Risk of Bias Assessment of Individual Studies

|                                     | Study design and objectives | Bias in selection of subjects and constitution of study groups | Bias due to withdrawal or loss to follow up (attrition) | Information bias regarding the drug safety outcome | Other information bias | Statistical methods to control confounding | Statistical methods excluding methods to control confounding | Conflict of interest | SUMMARY RISK OF BIAS |
|-------------------------------------|-----------------------------|----------------------------------------------------------------|---------------------------------------------------------|----------------------------------------------------|------------------------|--------------------------------------------|--------------------------------------------------------------|----------------------|----------------------|
| <i>Randomised Controlled Trials</i> |                             |                                                                |                                                         |                                                    |                        |                                            |                                                              |                      |                      |
| 4ABC 2011 <sup>10</sup>             | ●                           | ●                                                              | ●                                                       | ●                                                  | ●                      | ●                                          | ●                                                            | ●                    | ●                    |
| Adam 2010 <sup>11</sup>             | ●                           | ●                                                              | ●                                                       | ●                                                  | ●                      | ●                                          | ●                                                            | ●                    | ●                    |
| Agarwal 2013 <sup>12</sup>          | ●                           | ●                                                              | ●                                                       | ●                                                  | ●                      | ●                                          | ●                                                            | ●                    | ●                    |
| Annerberg 2011 <sup>13</sup>        | ●                           | ●                                                              | ●                                                       | ●                                                  | ●                      | ●                                          | ●                                                            | ●                    | ●                    |
| Ashley 2004 <sup>14</sup>           | ●                           | ●                                                              | ●                                                       | ●                                                  | ●                      | ●                                          | ●                                                            | ●                    | ●                    |
| Ashley 2005 <sup>15</sup>           | ●                           | ●                                                              | ●                                                       | ●                                                  | ●                      | ●                                          | ●                                                            | ●                    | ●                    |
| Ashley 2014 <sup>16</sup>           | ●                           | ●                                                              | ●                                                       | ●                                                  | ●                      | ●                                          | ●                                                            | ●                    | ●                    |
| Awab 2010 <sup>17</sup>             | ●                           | ●                                                              | ●                                                       | ●                                                  | ●                      | ●                                          | ●                                                            | ●                    | ●                    |
| Awab 2016 <sup>18</sup>             | ●                           | ●                                                              | ●                                                       | ●                                                  | ●                      | ●                                          | ●                                                            | ●                    | ●                    |
| Bassat 2009 <sup>19</sup>           | ●                           | ●                                                              | ●                                                       | ●                                                  | ●                      | ●                                          | ●                                                            | ●                    | ●                    |
| Borrmann 2011 <sup>20</sup>         | ●                           | ●                                                              | ●                                                       | ●                                                  | ●                      | ●                                          | ●                                                            | ●                    | ●                    |
| Dicko 2016 <sup>21</sup>            | ●                           | ●                                                              | ●                                                       | ●                                                  | ●                      | ●                                          | ●                                                            | ●                    | ●                    |
| Grande 2007 <sup>22</sup>           | ●                           | ●                                                              | ●                                                       | ●                                                  | ●                      | ●                                          | ●                                                            | ●                    | ●                    |
| Hasugian 2007 <sup>23</sup>         | ●                           | ●                                                              | ●                                                       | ●                                                  | ●                      | ●                                          | ●                                                            | ●                    | ●                    |
| Hien 2012 <sup>24</sup>             | ●                           | ●                                                              | ●                                                       | ●                                                  | ●                      | ●                                          | ●                                                            | ●                    | ●                    |
| Janssens 2007 <sup>25</sup>         | ●                           | ●                                                              | ●                                                       | ●                                                  | ●                      | ●                                          | ●                                                            | ●                    | ●                    |
| Kamya 2007 <sup>26</sup>            | ●                           | ●                                                              | ●                                                       | ●                                                  | ●                      | ●                                          | ●                                                            | ●                    | ●                    |



|                                |   |   |   |   |   |   |   |   |   |
|--------------------------------|---|---|---|---|---|---|---|---|---|
| Karema 2006 <sup>27</sup>      | ● | ● | ● | ● | ● | ● | ● | ● | ● |
| Karunajeewa 2008 <sup>28</sup> | ● | ● | ● | ● | ● | ● | ● | ● | ● |
| Krudsood 2007 <sup>29</sup>    | ● | ● | ● | ● | ● | ● | ● | ● | ● |
| Lon 2014 <sup>30</sup>         | ● | ● | ● | ● | ● | ● | ● | ● | ● |
| Mayxay 2006 <sup>31</sup>      | ● | ● | ● | ● | ● | ● | ● | ● | ● |
| Mens 2008 <sup>32</sup>        | ● | ● | ● | ● | ● | ● | ● | ● | ● |
| Moore 2014 <sup>33</sup>       | ● | ● | ● | ● | ● | ● | ● | ● | ● |
| Nelwan 2015 <sup>34</sup>      | ● | ● | ● | ● | ● | ● | ● | ● | ● |
| Nji 2015 <sup>35</sup>         | ● | ● | ● | ● | ● | ● | ● | ● | ● |
| Ogutu 2014 <sup>36</sup>       | ● | ● | ● | ● | ● | ● | ● | ● | ● |
| Okebe 2016 <sup>37</sup>       | ● | ● | ● | ● | ● | ● | ● | ● | ● |
| Onyamboko 2014 <sup>38</sup>   | ● | ● | ● | ● | ● | ● | ● | ● | ● |
| Pasaribu 2013 <sup>39</sup>    | ● | ● | ● | ● | ● | ● | ● | ● | ● |
| Phyo 2011 <sup>40</sup>        | ● | ● | ● | ● | ● | ● | ● | ● | ● |
| PregACT 2016 <sup>41</sup>     | ● | ● | ● | ● | ● | ● | ● | ● | ● |
| Ratcliff 2007 <sup>42</sup>    | ● | ● | ● | ● | ● | ● | ● | ● | ● |
| Sawa 2013 <sup>43</sup>        | ● | ● | ● | ● | ● | ● | ● | ● | ● |
| Smithuis 2006 <sup>44</sup>    | ● | ● | ● | ● | ● | ● | ● | ● | ● |
| Smithuis 2010 <sup>45</sup>    | ● | ● | ● | ● | ● | ● | ● | ● | ● |
| Sowumni 2016 <sup>46</sup>     | ● | ● | ● | ● | ● | ● | ● | ● | ● |
| Spring 2015 <sup>47</sup>      | ● | ● | ● | ● | ● | ● | ● | ● | ● |
| Sutanto 2013 <sup>48</sup>     | ● | ● | ● | ● | ● | ● | ● | ● | ● |

|                               |   |   |   |   |   |   |   |   |   |
|-------------------------------|---|---|---|---|---|---|---|---|---|
| Sutanto 2013a <sup>49</sup>   | ● | ● | ● | ● | ● | ● | ● | ● | ● |
| Sylla 2013 <sup>50</sup>      | ● | ● | ● | ● | ● | ● | ● | ● | ● |
| Tangpukdee 2005 <sup>51</sup> | ● | ● | ● | ● | ● | ● | ● | ● | ● |
| Thanh 2009 <sup>52</sup>      | ● | ● | ● | ● | ● | ● | ● | ● | ● |
| Thuan 2016 <sup>53</sup>      | ● | ● | ● | ● | ● | ● | ● | ● | ● |
| Tijtra 2012 <sup>54</sup>     | ● | ● | ● | ● | ● | ● | ● | ● | ● |
| Tran 2004 <sup>55</sup>       | ● | ● | ● | ● | ● | ● | ● | ● | ● |
| Ursing 2016 <sup>56</sup>     | ● | ● | ● | ● | ● | ● | ● | ● | ● |
| Valecha 2010 <sup>57</sup>    | ● | ● | ● | ● | ● | ● | ● | ● | ● |
| Wang 2008 <sup>58</sup>       | ● | ● | ● | ● | ● | ● | ● | ● | ● |
| Whegang 2010 <sup>59</sup>    | ● | ● | ● | ● | ● | ● | ● | ● | ● |
| Yavo 2011 <sup>60</sup>       | ● | ● | ● | ● | ● | ● | ● | ● | ● |
| Yeka 2008 <sup>61</sup>       | ● | ● | ● | ● | ● | ● | ● | ● | ● |
| Zongo 2007 <sup>62</sup>      | ● | ● | ● | ● | ● | ● | ● | ● | ● |
| Bigira 2014 <sup>63</sup>     | ● | ● | ● | ● | ● | ● | ● | ● | ● |
| Bojang 2010 <sup>64</sup>     | ● | ● | ● | ● | ● | ● | ● | ● | ● |
| Cisse 2009 <sup>65</sup>      | ● | ● | ● | ● | ● | ● | ● | ● | ● |
| Desai 2015 <sup>66</sup>      | ● | ● | ● | ● | ● | ● | ● | ● | ● |
| Kakuru 2016 <sup>67</sup>     | ● | ● | ● | ● | ● | ● | ● | ● | ● |
| Kamya 2014 <sup>68</sup>      | ● | ● | ● | ● | ● | ● | ● | ● | ● |
| Lwin 2012 <sup>69</sup>       | ● | ● | ● | ● | ● | ● | ● | ● | ● |
| Nankabirwa 2014 <sup>70</sup> | ● | ● | ● | ● | ● | ● | ● | ● | ● |

|                               |   |   |   |   |   |   |   |   |   |
|-------------------------------|---|---|---|---|---|---|---|---|---|
| Natureeba 2017 <sup>71</sup>  | ● | ● | ● | ● | ● | ● | ● | ● | ● |
| Wanzira 2014 <sup>72</sup>    | ● | ● | ● | ● | ● | ● | ● | ● | ● |
| Zongo 2015 <sup>73</sup>      | ● | ● | ● | ● | ● | ● | ● | ● | ● |
| START-IPT <sup>74</sup>       | ● | ● | ● | ● | ● | ● | ● | ● | ● |
| STOPMIP-ID                    | ● | ● | ● | ● | ● | ● | ● | ● | ● |
| MACEPA <sup>75</sup>          | ● | ● | ● | ● | ● | ● | ● | ● | ● |
| TME                           | ● | ● | ● | ● | ● | ● | ● | ● | ● |
| <i>Cohort</i>                 |   |   |   |   |   |   |   |   |   |
| Adam 2012 <sup>76</sup>       | ● | ● | ● | ● | ● | ● | ● | ● | ● |
| Amaratunga 2016 <sup>77</sup> | ● | ● | ● | ● | ● | ● | ● | ● | ● |
| Baiden 2015 <sup>78</sup>     | ● | ● | ● | ● | ● | ● | ● | ● | ● |
| Chu 2017 <sup>79</sup>        | ● | ● | ● | ● | ● | ● | ● | ● | ● |
| Irawati 2007 <sup>80</sup>    | ● | ● | ● | ● | ● | ● | ● | ● | ● |
| Kakar 2016 <sup>81</sup>      | ● | ● | ● | ● | ● | ● | ● | ● | ● |
| Kheng 2015 <sup>82</sup>      | ● | ● | ● | ● | ● | ● | ● | ● | ● |
| Leang 2013 <sup>83</sup>      | ● | ● | ● | ● | ● | ● | ● | ● | ● |
| Leang 2015 <sup>84</sup>      | ● | ● | ● | ● | ● | ● | ● | ● | ● |
| Lidia 2015 <sup>85</sup>      | ● | ● | ● | ● | ● | ● | ● | ● | ● |
| Liu 2015 <sup>86</sup>        | ● | ● | ● | ● | ● | ● | ● | ● | ● |
| Mohamed 2017 <sup>87</sup>    | ● | ● | ● | ● | ● | ● | ● | ● | ● |
| Myint 2017 <sup>88</sup>      | ● | ● | ● | ● | ● | ● | ● | ● | ● |
| Plucinski 2015 <sup>89</sup>  | ● | ● | ● | ● | ● | ● | ● | ● | ● |
| Plucinski 2017 <sup>90</sup>  | ● | ● | ● | ● | ● | ● | ● | ● | ● |

|                                               |   |   |   |   |   |   |   |   |   |
|-----------------------------------------------|---|---|---|---|---|---|---|---|---|
| Rijken 2008 <sup>91</sup>                     | ● | ● | ● | ● | ● | ● | ● | ● | ● |
| Rijken 2011 <sup>92</sup>                     | ● | ● | ● | ● | ● | ● | ● | ● | ● |
| Sow 2016 <sup>93</sup>                        | ● | ● | ● | ● | ● | ● | ● | ● | ● |
| Thanh 2017 <sup>94</sup>                      | ● | ● | ● | ● | ● | ● | ● | ● | ● |
| Thriemer 2014 <sup>95</sup>                   | ● | ● | ● | ● | ● | ● | ● | ● | ● |
| Tun 2016 <sup>96</sup>                        | ● | ● | ● | ● | ● | ● | ● | ● | ● |
| Wang 2015 <sup>97</sup>                       | ● | ● | ● | ● | ● | ● | ● | ● | ● |
| Zongo 2014 <sup>98</sup>                      | ● | ● | ● | ● | ● | ● | ● | ● | ● |
| Poespoprodjo 2014 <sup>99</sup>               | ● | ● | ● | ● | ● | ● | ● | ● | ● |
| MALTEM                                        | ● | ● | ● | ● | ● | ● | ● | ● | ● |
| BMEP                                          | ● | ● | ● | ● | ● | ● | ● | ● | ● |
| <i>Systematic Reviews &amp; Meta-analyses</i> |   |   |   |   |   |   |   |   |   |
| Gutman 2017 <sup>100</sup>                    | ● | ● | ● | ● | ● | ● | ● | ● | ● |
| Zani 2014 <sup>101</sup>                      | ● | ● | ● | ● | ● | ● | ● | ● | ● |

## References

1. Sarganas G, Garbe E, Klimpel A, Hering RC, Bronder E, Haverkamp W. Epidemiology of symptomatic drug-induced long QT syndrome and Torsade de Pointes in Germany. *Europace* 2014; **16**(1): 101-8.
2. Molokhia M, Pathak A, Lapeyre-Mestre M, et al. Case ascertainment and estimated incidence of drug-induced long-QT syndrome: study in Southwest France. *Br J Clin Pharmacol* 2008; **66**(3): 386-95.
3. Darpo B. Spectrum of drugs prolonging QT interval and the incidence of torsades de pointes. *European Heart Journal Supplements* 2001; **Supplement K**: K70-K80.
4. Roden DM. Predicting drug-induced QT prolongation and torsades de pointes. *J Physiol* 2016; **594**(9): 2459-68.
5. Ackerman M, Atkins DL, Triedman JK. Sudden Cardiac Death in the Young. *Circulation* 2016; **133**(10): 1006-26.
6. Bagnall RD, Weintraub RG, Ingles J, et al. A Prospective Study of Sudden Cardiac Death among Children and Young Adults. *N Engl J Med* 2016; **374**(25): 2441-52.
7. Bonny A, Tibazarwa K, Mbouh S, et al. Epidemiology of sudden cardiac death in Cameroon: the first population-based cohort survey in sub-Saharan Africa. *Int J Epidemiol* 2017; **46**(4): 1230-8.
8. Coldiron ME, Lasry E, Bouhenia M, et al. Intermittent preventive treatment for malaria among children in a refugee camp in Northern Uganda: lessons learned. *Malar J* 2017; **16**(1): 218.
9. Brown LD, Cai TT, DasGupta A. Interval Estimation for a Binomial Proportion. *Statistical Science* 2001; **16**(2): 101-33.
10. Four Artemisinin-Based Combinations Study G. A head-to-head comparison of four artemisinin-based combinations for treating uncomplicated malaria in African children: a randomized trial. *PLoS Medicine / Public Library of Science* 2011; **8**(11): e1001119.
11. Adam I, Salah MT, Eltahir HG, Elhassan AH, Elmardi KA, Malik EM. Dihydroartemisinin-piperaquine versus artemether-lumefantrine, in the treatment of uncomplicated Plasmodium falciparum malaria in central Sudan. *Annals of Tropical Medicine & Parasitology* 2010; **104**(4): 319-26.
12. Agarwal A, McMorrow M, Onyango P, et al. A randomized trial of artemether-lumefantrine and dihydroartemisinin-piperaquine in the treatment of uncomplicated malaria among children in western Kenya. *Malaria Journal* 2013; **12**: 254.
13. Annerberg A, Lwin KM, Lindegardh N, et al. A small amount of fat does not affect piperaquine exposure in patients with malaria. *Antimicrobial Agents & Chemotherapy* 2011; **55**(9): 3971-6.
14. Ashley EA, Krudsood S, Phaiphun L, et al. Randomized, controlled dose-optimization studies of dihydroartemisinin-piperaquine for the treatment of uncomplicated multidrug-resistant falciparum malaria in Thailand.[Erratum appears in J Infect Dis. 2005 Apr 1;191(7):1204]. *Journal of Infectious Diseases* 2004; **190**(10): 1773-82.
15. Ashley EA, McGready R, Hutagalung R, et al. A randomized, controlled study of a simple, once-daily regimen of dihydroartemisinin-piperaquine for the treatment of uncomplicated, multidrug-resistant falciparum malaria. *Clinical Infectious Diseases* 2005; **41**(4): 425-32.
16. Ashley EA, Dhorda M, Fairhurst RM, et al. Spread of artemisinin resistance in Plasmodium falciparum malaria. *New England Journal of Medicine* 2014; **371**(5): 411-23.
17. Awab GR, Pukrittayakamee S, Imwong M, et al. Dihydroartemisinin-piperaquine versus chloroquine to treat vivax malaria in Afghanistan: an open randomized, non-inferiority, trial. *Malaria Journal* 2010; **9**: 105.
18. Awab GR, Imwong M, Pukrittayakamee S, et al. Clinical trials of artesunate plus sulfadoxine-pyrimethamine for Plasmodium falciparum malaria in Afghanistan: maintained efficacy a decade after introduction. *Malaria Journal* 2016; **15**: 121.
19. Bassat Q, Mulenga M, Tinto H, et al. Dihydroartemisinin-piperaquine and artemether-lumefantrine for treating uncomplicated malaria in African children: a randomised, non-inferiority trial. *PLoS ONE [Electronic Resource]* 2009; **4**(11): e7871.
20. Borrmann S, Sasi P, Mwai L, et al. Declining responsiveness of Plasmodium falciparum infections to artemisinin-based combination treatments on the Kenyan coast. *PLoS ONE [Electronic Resource]* 2011; **6**(11): e26005.

21. Dicko A, Brown JM, Diawara H, et al. Primaquine to reduce transmission of *Plasmodium falciparum* malaria in Mali: a single-blind, dose-ranging, adaptive randomised phase 2 trial. *The Lancet Infectious Diseases* 2016; **16**(6): 674-84.
22. Grande T, Bernasconi A, Erhart A, et al. A randomised controlled trial to assess the efficacy of dihydroartemisinin-piperaquine for the treatment of uncomplicated *falciparum* malaria in Peru. *PLoS ONE [Electronic Resource]* 2007; **2**(10): e1101.
23. Hasugian AR, Purba HL, Kenangalem E, et al. Dihydroartemisinin-piperaquine versus artesunate-amodiaquine: superior efficacy and posttreatment prophylaxis against multidrug-resistant *Plasmodium falciparum* and *Plasmodium vivax* malaria. *Clinical Infectious Diseases* 2007; **44**(8): 1067-74.
24. Hien TT, Thuy-Nhien NT, Phu NH, et al. In vivo susceptibility of *Plasmodium falciparum* to artesunate in Binh Phuoc Province, Vietnam. *Malaria Journal* 2012; **11**: 355.
25. Janssens B, van Herp M, Goubert L, et al. A randomized open study to assess the efficacy and tolerability of dihydroartemisinin-piperaquine for the treatment of uncomplicated *falciparum* malaria in Cambodia. *Tropical Medicine & International Health* 2007; **12**(2): 251-9.
26. Kanya MR, Yeka A, Bukirwa H, et al. Artemether-lumefantrine versus dihydroartemisinin-piperaquine for treatment of malaria: a randomized trial. *PLoS Clinical Trials* 2007; **2**(5): e20.
27. Karema C, Fanello CI, van Overmeir C, et al. Safety and efficacy of dihydroartemisinin/piperaquine (Artekin) for the treatment of uncomplicated *Plasmodium falciparum* malaria in Rwandan children. *Transactions of the Royal Society of Tropical Medicine & Hygiene* 2006; **100**(12): 1105-11.
28. Karunajeewa HA, Mueller I, Senn M, et al. A trial of combination antimalarial therapies in children from Papua New Guinea. *New England Journal of Medicine* 2008; **359**(24): 2545-57.
29. Krudsood S, Tangpukdee N, Thanchatwet V, et al. Dose ranging studies of new artemisinin-piperaquine fixed combinations compared to standard regimens of artemisinin combination therapies for acute uncomplicated *falciparum* malaria. *Southeast Asian Journal of Tropical Medicine & Public Health* 2007; **38**(6): 971-8.
30. Lon C, Manning JE, Vanachayangkul P, et al. Efficacy of two versus three-day regimens of dihydroartemisinin-piperaquine for uncomplicated malaria in military personnel in northern Cambodia: an open-label randomized trial. *PLoS ONE [Electronic Resource]* 2014; **9**(3): e93138.
31. Mayxay M, Thongpraseuth V, Khanthavong M, et al. An open, randomized comparison of artesunate plus mefloquine vs. dihydroartemisinin-piperaquine for the treatment of uncomplicated *Plasmodium falciparum* malaria in the Lao People's Democratic Republic (Laos). *Tropical Medicine & International Health* 2006; **11**(8): 1157-65.
32. Mens PF, Sawa P, van Amsterdam SM, et al. A randomized trial to monitor the efficacy and effectiveness by QT-NASBA of artemether-lumefantrine versus dihydroartemisinin-piperaquine for treatment and transmission control of uncomplicated *Plasmodium falciparum* malaria in western Kenya. *Malaria Journal* 2008; **7**: 237.
33. Moore BR, Benjamin JM, Salman S, et al. Effect of coadministered fat on the tolerability, safety, and pharmacokinetic properties of dihydroartemisinin-piperaquine in Papua New Guinean children with uncomplicated malaria. *Antimicrobial Agents & Chemotherapy* 2014; **58**(10): 5784-94.
34. Nelwan EJ, Ekawati LL, Tjahjono B, et al. Randomized trial of primaquine hypnozoitocidal efficacy when administered with artemisinin-combined blood schizontocides for radical cure of *Plasmodium vivax* in Indonesia. *BMC Medicine* 2015; **13**: 294.
35. Nji AM, Ali IM, Moyeh MN, et al. Randomized non-inferiority and safety trial of dihydroartemisinin-piperaquine and artesunate-amodiaquine versus artemether-lumefantrine in the treatment of uncomplicated *Plasmodium falciparum* malaria in Cameroonian children. *Malaria Journal* 2015; **14**: 27.
36. Ogutu BR, Onyango KO, Koskei N, et al. Efficacy and safety of artemether-lumefantrine and dihydroartemisinin-piperaquine in the treatment of uncomplicated *Plasmodium falciparum* malaria in Kenyan children aged less than five years: results of an open-label, randomized, single-centre study. *Malaria Journal* 2014; **13**: 33.

37. Okebe J, Bousema T, Affara M, et al. The Gametocytocidal Efficacy of Different Single Doses of Primaquine with Dihydroartemisinin-piperaquine in Asymptomatic Parasite Carriers in The Gambia: A Randomized Controlled Trial. *EBioMedicine* 2016; **13**: 348-55.
38. Onyamboko MA, Fanello CI, Wongsanen K, et al. Randomized comparison of the efficacies and tolerabilities of three artemisinin-based combination treatments for children with acute Plasmodium falciparum malaria in the Democratic Republic of the Congo. *Antimicrobial Agents & Chemotherapy* 2014; **58**(9): 5528-36.
39. Pasaribu AP, Chokejindachai W, Sirivichayakul C, et al. A randomized comparison of dihydroartemisinin-piperaquine and artesunate-amodiaquine combined with primaquine for radical treatment of vivax malaria in Sumatera, Indonesia. *Journal of Infectious Diseases* 2013; **208**(11): 1906-13.
40. Phyo AP, Lwin KM, Price RN, et al. Dihydroartemisinin-piperaquine versus chloroquine in the treatment of Plasmodium vivax malaria in Thailand: a randomized controlled trial. *Clinical Infectious Diseases* 2011; **53**(10): 977-84.
41. Pregact Study G, Pekyi D, Ampromfi AA, et al. Four Artemisinin-Based Treatments in African Pregnant Women with Malaria. *New England Journal of Medicine* 2016; **374**(10): 913-27.
42. Ratcliff A, Siswantoro H, Kenangalem E, et al. Two fixed-dose artemisinin combinations for drug-resistant falciparum and vivax malaria in Papua, Indonesia: an open-label randomised comparison. *Lancet* 2007; **369**(9563): 757-65.
43. Sawa P, Shekalaghe SA, Drakeley CJ, et al. Malaria transmission after artemether-lumefantrine and dihydroartemisinin-piperaquine: a randomized trial. *Journal of Infectious Diseases* 2013; **207**(11): 1637-45.
44. Smithuis F, Kyaw MK, Phe O, et al. Efficacy and effectiveness of dihydroartemisinin-piperaquine versus artesunate-mefloquine in falciparum malaria: an open-label randomised comparison. *Lancet* 2006; **367**(9528): 2075-85.
45. Smithuis F, Kyaw MK, Phe O, et al. Effectiveness of five artemisinin combination regimens with or without primaquine in uncomplicated falciparum malaria: an open-label randomised trial. *The Lancet Infectious Diseases* 2010; **10**(10): 673-81.
46. Sowunmi A, Akano K, Ayede AI, et al. Clinical illness and outcomes in Nigerian children with late-appearing anaemia after artemisinin-based combination treatments of uncomplicated falciparum malaria. *BMC Infectious Diseases* 2016; **16**: 240.
47. Spring MD, Lin JT, Manning JE, et al. Dihydroartemisinin-piperaquine failure associated with a triple mutant including kelch13 C580Y in Cambodia: an observational cohort study. *The Lancet Infectious Diseases* 2015; **15**(6): 683-91.
48. Sutanto I, Suprijanto S, Kosasih A, et al. The effect of primaquine on gametocyte development and clearance in the treatment of uncomplicated falciparum malaria with dihydroartemisinin-piperaquine in South sumatra, Western indonesia: an open-label, randomized, controlled trial. *Clinical Infectious Diseases* 2013; **56**(5): 685-93.
49. Sutanto I, Tjahjono B, Basri H, et al. Randomized, open-label trial of primaquine against vivax malaria relapse in Indonesia. *Antimicrobial Agents & Chemotherapy* 2013; **57**(3): 1128-35.
50. Sylla K, Abiola A, Tine RCK, et al. Monitoring the efficacy and safety of three artemisinin based-combinations therapies in Senegal: Results from two years surveillance. *BMC Infectious Diseases* 2013; **13** (1) (no pagination)(598).
51. Tangpukdee N, Krudsood S, Thanachartwet W, et al. An open randomized clinical trial of Artekin vs artesunate-mefloquine in the treatment of acute uncomplicated falciparum malaria. *Southeast Asian Journal of Tropical Medicine & Public Health* 2005; **36**(5): 1085-91.
52. Thanh NX, Trung TN, Phong NC, et al. Open label randomized comparison of dihydroartemisinin-piperaquine and artesunate-amodiaquine for the treatment of uncomplicated Plasmodium falciparum malaria in central Vietnam. *Tropical Medicine & International Health* 2009; **14**(5): 504-11.
53. Thuan PD, Ca NT, Van Toi P, et al. A Randomized Comparison of Chloroquine Versus Dihydroartemisinin-Piperaquine for the Treatment of Plasmodium vivax Infection in Vietnam. *American Journal of Tropical Medicine & Hygiene* 2016; **94**(4): 879-85.

54. Tjitra E, Hasugian AR, Siswanto H, et al. Efficacy and safety of artemisinin-naphthoquine versus dihydroartemisinin-piperaquine in adult patients with uncomplicated malaria: a multi-centre study in Indonesia. *Malaria Journal* 2012; **11**: 153.
55. Tran TH, Dolecek C, Pham PM, et al. Dihydroartemisinin-piperaquine against multidrug-resistant *Plasmodium falciparum* malaria in Vietnam: randomised clinical trial. *Lancet* 2004; **363**(9402): 18-22.
56. Ursing J, Rombo L, Rodrigues A, Kofoed PE. Artemether-Lumefantrine versus Dihydroartemisinin-Piperaquine for Treatment of Uncomplicated *Plasmodium falciparum* Malaria in Children Aged Less than 15 Years in Guinea-Bissau - An Open-Label Non-Inferiority Randomised Clinical Trial. *PLoS ONE [Electronic Resource]* 2016; **11**(9): e0161495.
57. Valecha N, Phyo AP, Mayxay M, et al. An open-label, randomised study of dihydroartemisinin-piperaquine versus artesunate-mefloquine for falciparum malaria in Asia.[Erratum appears in PLoS One. 2010;5(9). doi: 10.1371/annotation/5603e1d7-03ca-4127-ab99-1d1e07d905d4 Note: Dosage error in published abstract; MEDLINE/PubMed abstract corrected], [Erratum appears in PLoS One. 2010;5(9) doi: 10.1371/annotation/73589846-034d-4b6f-9668-54f278fa03e8 Note: Pukittayakamee, Sasithon [corrected to Pukrittayakamee, Sasithon]]. *PLoS ONE [Electronic Resource]* 2010; **5**(7): e11880.
58. Wang SQ, Christophel E, Lin SG, et al. [Efficacy of dihydroartemisinin-piperaquine and artemether-lumefantrine in the treatment of uncomplicated falciparum malaria in Hainan, China]. *Chung-Kuo Chi Sheng Chung Hsueh Yu Chi Sheng Chung Ping Tsa Chih Chinese Journal of Parasitology & Parasitic Diseases* 2008; **26**(1): 50-2.
59. Whegang SY, Tahar R, Foumane VN, et al. Efficacy of non-artemisinin- and artemisinin-based combination therapies for uncomplicated falciparum malaria in Cameroon. *Malaria Journal* 2010; **9**: 56.
60. Yavo W, Faye B, Kuete T, et al. Multicentric assessment of the efficacy and tolerability of dihydroartemisinin-piperaquine compared to artemether-lumefantrine in the treatment of uncomplicated *Plasmodium falciparum* malaria in sub-Saharan Africa. *Malaria Journal* 2011; **10**: 198.
61. Yeka A, Dorsey G, Kanya MR, et al. Artemether-lumefantrine versus dihydroartemisinin-piperaquine for treating uncomplicated malaria: a randomized trial to guide policy in Uganda. *PLoS ONE [Electronic Resource]* 2008; **3**(6): e2390.
62. Zongo I, Dorsey G, Rouamba N, et al. Randomized comparison of amodiaquine plus sulfadoxine-pyrimethamine, artemether-lumefantrine, and dihydroartemisinin-piperaquine for the treatment of uncomplicated *Plasmodium falciparum* malaria in Burkina Faso. *Clinical Infectious Diseases* 2007; **45**(11): 1453-61.
63. Bigira V, Kapisi J, Clark TD, et al. Protective efficacy and safety of three antimalarial regimens for the prevention of malaria in young Ugandan children: a randomized controlled trial. *PLoS Medicine / Public Library of Science* 2014; **11**(8): e1001689.
64. Bojang K, Akor F, Bittaye O, et al. A Randomised Trial to Compare the Safety, Tolerability and Efficacy of Three Drug Combinations for Intermittent Preventive Treatment in Children. *PLoS ONE* 2010; **5**(6).
65. Cisse B, Cairns M, Faye E, et al. Randomized trial of piperaquine with sulfadoxine-pyrimethamine or dihydroartemisinin for malaria intermittent preventive treatment in children. *PLoS ONE* 2009; **4** (9) (no pagination)(e7164).
66. Desai M, Gutman J, L'Lanziva A, et al. Intermittent screening and treatment or intermittent preventive treatment with dihydroartemisinin-piperaquine versus intermittent preventive treatment with sulfadoxine-pyrimethamine for the control of malaria during pregnancy in western Kenya: an open-label, three-group, randomised controlled superiority trial. *Lancet* 2015; **386**(10012): 2507-19.
67. Kakuru A, Jagannathan P, Muhindo MK, et al. Dihydroartemisinin-Piperaquine for the Prevention of Malaria in Pregnancy. *New England Journal of Medicine* 2016; **374**(10): 928-39.
68. Kanya MR, Kapisi J, Bigira V, et al. Efficacy and safety of three regimens for the prevention of malaria in young HIV-exposed Ugandan children: a randomized controlled trial. *AIDS* 2014; **28**(18): 2701-9.
69. Lwin KM, Phyo AP, Tarning J, et al. Randomized, double-blind, placebo-controlled trial of monthly versus bimonthly dihydroartemisinin-piperaquine chemoprevention in adults at high risk of malaria. *Antimicrobial Agents & Chemotherapy* 2012; **56**(3): 1571-7.



70. Nankabirwa JI, Wandera B, Amuge P, et al. Impact of intermittent preventive treatment with dihydroartemisinin-piperazine on malaria in Ugandan schoolchildren: a randomized, placebo-controlled trial. *Clinical Infectious Diseases* 2014; **58**(10): 1404-12.
71. Natureeba P, Kakuru A, Muhindo M, et al. Intermittent Preventive Treatment with Dihydroartemisinin-piperazine for the Prevention of Malaria among HIV-infected Pregnant Women. *Journal of Infectious Diseases* 2017; **22**: 22.
72. Wanzira H, Kakuru A, Arinaitwe E, et al. Longitudinal outcomes in a cohort of Ugandan children randomized to artemether-lumefantrine versus dihydroartemisinin-piperazine for the treatment of malaria. *Clinical Infectious Diseases* 2014; **59**(4): 509-16.
73. Zongo I, Milligan P, Compaore YD, et al. Randomized Noninferiority Trial of Dihydroartemisinin-Piperazine Compared with Sulfadoxine-Pyrimethamine plus Amodiaquine for Seasonal Malaria Chemoprevention in Burkina Faso. *Antimicrobial Agents & Chemotherapy* 2015; **59**(8): 4387-96.
74. Maiteki C, Gonahasa S, Kigozi SP, et al. School-based treatment with act to reduce transmission' (start-IPT): Evaluation of the community impact of intermittent preventive treatment for malaria in Ugandan children. *American Journal of Tropical Medicine and Hygiene* 2015; **93** (4 Supplement): 84.
75. Eisele TP, Bennett A, Silumbe K, et al. Short-term Impact of Mass Drug Administration With Dihydroartemisinin Plus Piperazine on Malaria in Southern Province Zambia: A Cluster-Randomized Controlled Trial. *Journal of Infectious Diseases* 2016; **214**(12): 1831-9.
76. Adam I, Tarning J, Lindegardh N, Mahgoub H, McGready R, Nosten F. Pharmacokinetics of piperazine in pregnant women in Sudan with uncomplicated Plasmodium falciparum malaria. *American Journal of Tropical Medicine & Hygiene* 2012; **87**(1): 35-40.
77. Amaratunga C, Lim P, Suon S, et al. Dihydroartemisinin-piperazine resistance in Plasmodium falciparum malaria in Cambodia: a multisite prospective cohort study. *The Lancet Infectious Diseases* 2016; **16**(3): 357-65.
78. Baiden R, Oduro A, Halidou T, et al. Prospective observational study to evaluate the clinical safety of the fixed-dose artemisinin-based combination Eurartesim (dihydroartemisinin/piperazine), in public health facilities in Burkina Faso, Mozambique, Ghana, and Tanzania. *Malaria Journal* 2015; **14**: 160.
79. Chu CS, Bancone G, Moore KA, et al. Haemolysis in G6PD Heterozygous Females Treated with Primaquine for Plasmodium vivax Malaria: A Nested Cohort in a Trial of Radical Curative Regimens. *PLoS Medicine / Public Library of Science* 2017; **14**(2): e1002224.
80. Irawati N, Kurniawan B, Suwandi JF, Hasmiwati, Tjong DH, Kanedi M. Determination of the falciparum malaria resistance to artemisinin-based combination therapies in Pesawaran, Lampung, Indonesia. *Asian Journal of Epidemiology* 2017; **10**(1): 19-25.
81. Kakar Q, Sheikh S, Ahmed I, et al. Efficacy of artemisinin-based combination therapies for the treatment of falciparum malaria in Pakistan (2007-2015): In vivo response and dhfr and dhps mutations. *Acta Tropica* 2016; **164**: 17-22.
82. Kheng S, Muth S, Taylor WR, et al. Tolerability and safety of weekly primaquine against relapse of Plasmodium vivax in Cambodians with glucose-6-phosphate dehydrogenase deficiency. *BMC Medicine* 2015; **13**: 203.
83. Leang R, Barrette A, Bouth DM, et al. Efficacy of dihydroartemisinin-piperazine for treatment of uncomplicated Plasmodium falciparum and Plasmodium vivax in Cambodia, 2008 to 2010. *Antimicrobial Agents & Chemotherapy* 2013; **57**(2): 818-26.
84. Leang R, Taylor WR, Bouth DM, et al. Evidence of Plasmodium falciparum Malaria Multidrug Resistance to Artemisinin and Piperazine in Western Cambodia: Dihydroartemisinin-Piperazine Open-Label Multicenter Clinical Assessment. *Antimicrobial Agents & Chemotherapy* 2015; **59**(8): 4719-26.
85. Lidia K, Dwiprahasto I, Kristin E. Therapeutic effects of dihydroartemisinin piperazine versus chloroquine for uncomplicated Vivax Malaria in Kupang, East Nusa Tenggara, Indonesia. *International Journal of Pharmaceutical Sciences Review and Research* 2015; **31**(2): 247-51.
86. Liu H, Yang HL, Tang LH, et al. In vivo monitoring of dihydroartemisinin-piperazine sensitivity in Plasmodium falciparum along the China-Myanmar border of Yunnan Province, China from 2007 to 2013. *Malaria Journal* 2015; **14**: 47.

87. Mohamed AO, Abdel Hamid MM, Mohamed OS, et al. Efficacies of DHA-PPQ and AS/SP in patients with uncomplicated Plasmodium falciparum malaria in an area of an unstable seasonal transmission in Sudan. *Malaria Journal* 2017; **16**(1): 163.
88. Myint MK, Rasmussen C, Thi A, Bustos D, Ringwald P, Lin K. Therapeutic efficacy and artemisinin resistance in northern Myanmar: evidence from in vivo and molecular marker studies. *Malaria Journal* 2017; **16**(1): 143.
89. Plucinski MM, Talundzic E, Morton L, et al. Efficacy of artemether-lumefantrine and dihydroartemisinin-piperaquine for treatment of uncomplicated malaria in children in Zaire and Uige Provinces, Angola. *Antimicrobial Agents & Chemotherapy* 2015; **59**(1): 437-43.
90. Plucinski MM, Dimbu PR, Macaia AP, et al. Efficacy of artemether-lumefantrine, artesunate-amodiaquine, and dihydroartemisinin-piperaquine for treatment of uncomplicated Plasmodium falciparum malaria in Angola, 2015. *Malaria Journal* 2017; **16**(1): 62.
91. Rijken MJ, McGready R, Boel ME, et al. Dihydroartemisinin-piperaquine rescue treatment of multidrug-resistant Plasmodium falciparum malaria in pregnancy: a preliminary report. *American Journal of Tropical Medicine & Hygiene* 2008; **78**(4): 543-5.
92. Rijken MJ, McGready R, Phyo AP, et al. Pharmacokinetics of dihydroartemisinin and piperaquine in pregnant and nonpregnant women with uncomplicated falciparum malaria. *Antimicrobial Agents & Chemotherapy* 2011; **55**(12): 5500-6.
93. Sow D, Ndiaye JL, Sylla K, et al. [Evaluation of the efficacy and safety of three 2-drug combinations for the treatment of uncomplicated Plasmodium falciparum malaria in Senegal: artesunate-amodiaquine, dihydroartemisinin-piperaquine, and artemether-lumefantrine]. *Medecine et Sante Tropicales* 2016; **26**(1): 45-50.
94. Thanh NV, Thuy-Nhien N, Tuyen NT, et al. Rapid decline in the susceptibility of Plasmodium falciparum to dihydroartemisinin-piperaquine in the south of Vietnam. *Malaria Journal* 2017; **16**(1): 27.
95. Thriemer K, Hong NV, Rosanas-Urgell A, et al. Delayed parasite clearance after treatment with dihydroartemisinin-piperaquine in Plasmodium falciparum malaria patients in central Vietnam. *Antimicrobial Agents & Chemotherapy* 2014; **58**(12): 7049-55.
96. Tun KM, Jeeyapant A, Imwong M, et al. Parasite clearance rates in Upper Myanmar indicate a distinctive artemisinin resistance phenotype: a therapeutic efficacy study. *Malaria Journal* 2016; **15**: 185.
97. Wang Y, Yang Z, Yuan L, et al. Clinical Efficacy of Dihydroartemisinin-Piperaquine for the Treatment of Uncomplicated Plasmodium falciparum Malaria at the China-Myanmar Border. *American Journal of Tropical Medicine & Hygiene* 2015; **93**(3): 577-83.
98. Zongo I, Some FA, Somda SA, et al. Efficacy and day 7 plasma piperaquine concentrations in African children treated for uncomplicated malaria with dihydroartemisinin-piperaquine. *PLoS ONE [Electronic Resource]* 2014; **9**(8): e103200.
99. Poespoprodjo JR, Fobia W, Kenangalem E, et al. Dihydroartemisinin-piperaquine treatment of multidrug resistant falciparum and vivax malaria in pregnancy. *PLoS ONE [Electronic Resource]* 2014; **9**(1): e84976.
100. Gutman J, Kovacs S, Dorsey G, Stergachis A, Ter Kuile FO. Safety, tolerability, and efficacy of repeated doses of dihydroartemisinin-piperaquine for prevention and treatment of malaria: a systematic review and meta-analysis. *The Lancet Infectious Diseases* 2017; **17**(2): 184-93.
101. Zani B, Gathu M, Donegan S, Olliaro PL, Sinclair D. Dihydroartemisinin-piperaquine for treating uncomplicated Plasmodium falciparum malaria. *Cochrane Database of Systematic Reviews* 2014; (1): CD010927.
